# Supplementary material
Source: PubMed Central journal article supplement (PMC4080408)
Supplement: NIHMS585593-supplement-1.pdf [file NIHMS585593-supplement-1.pdf]

## Supplementary Figure 1

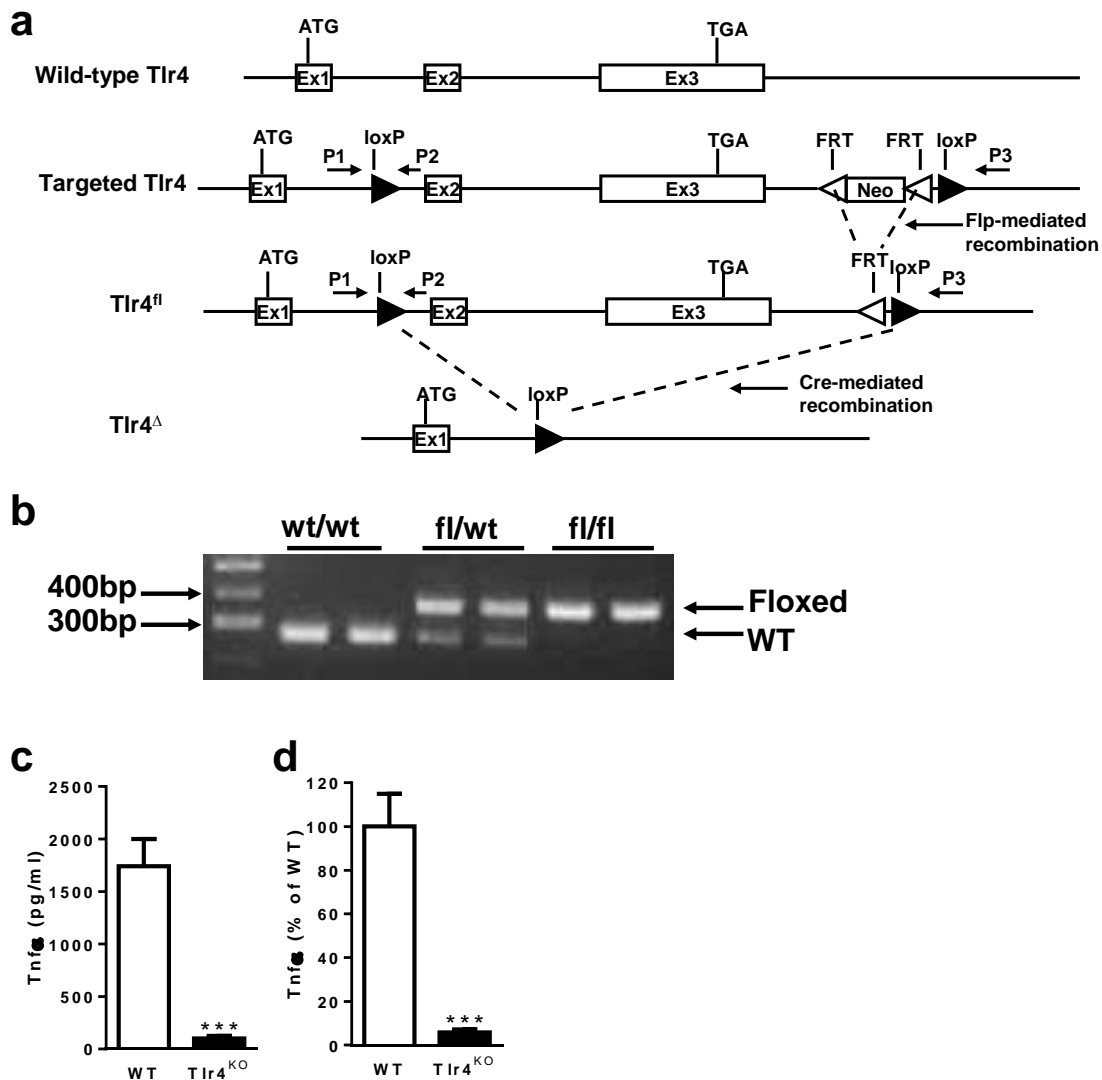

**Supplementary Figure 1. Generation of mice bearing a Cre-conditional Tlr4 null allele (Tlr4<sup>fl</sup>).** (a) Schematic diagram of the targeting strategy. (b) PCR analysis of tail-genomic DNA of mice bearing wild-type (WT) and/or floxed allele. PCR products of WT and floxed allele are 260 bp and 343 bp, respectively. (c) Circulating levels of Tnf $\alpha$  were measured in wild-type (WT) and Tlr4<sup>KO</sup> mice (6-8 weeks of age, n = 4-6) 1.5 h after intraperitoneally injection of lipopolysaccharide (LPS, 1mg kg<sup>-1</sup> body weight). (d) Levels are presented as a percentage relative of Tlr4<sup>fl/fl</sup> levels. \*\*\*p<0.001, compared between WT and Tlr4<sup>KO</sup> mice (Student's t-test). All data are presented as means  $\pm$  s.e.m.

## Supplementary Figure 2

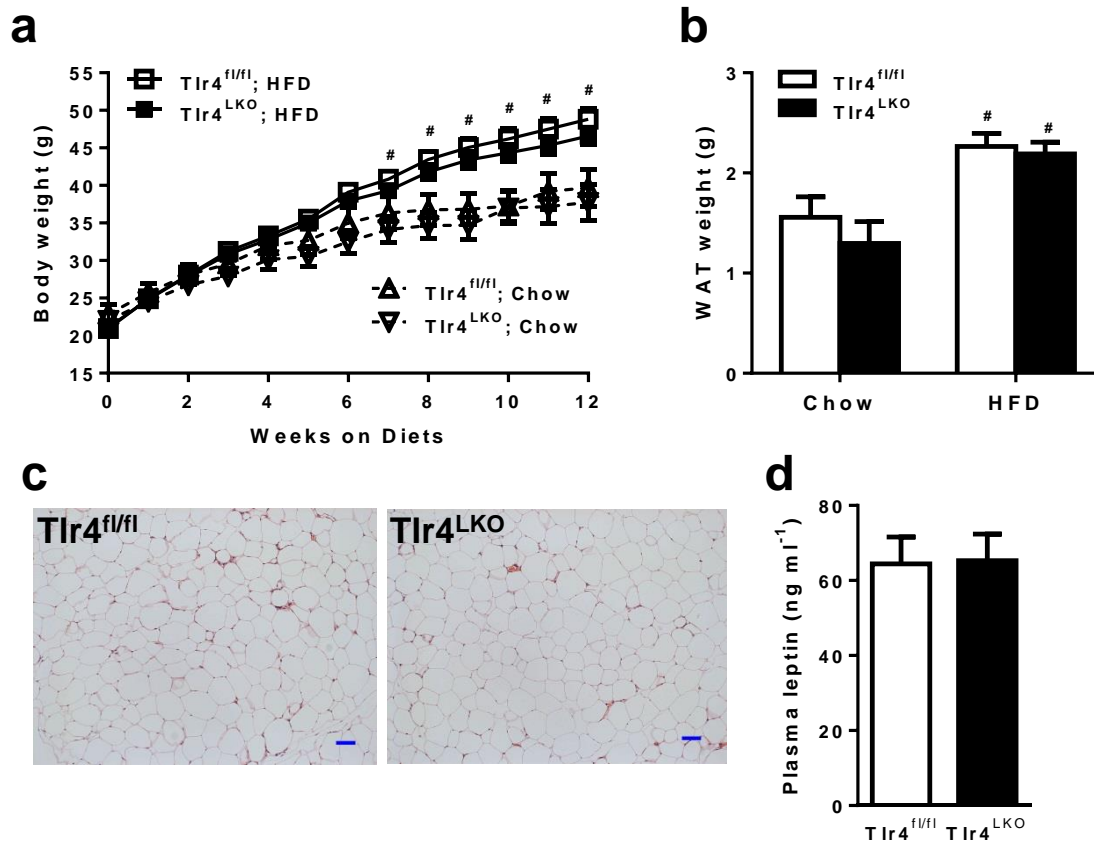

**Supplementary Figure 2. Tlr4<sup>fl/fl</sup> and Tlr4<sup>LKO</sup> mice showed similar adiposity and comparable plasma leptin concentrations.** (a) Body weight curves in Tlr4<sup>fl/fl</sup> and Tlr4<sup>LKO</sup> mice on a chow (n = 8) or HFD (n = 10-11) for 12 weeks. (b) Epididymal fat pad weight in mice after either chow (n = 8) or HFD (n = 10-11) for 12 weeks. (c) H&E staining of epididymal adipose tissue sections from HFD-fed mice. Scale bars, 200  $\mu$ m. (d) Plasma leptin concentrations (n = 9) in mice on HFD. # p < 0.05, compared between different diets for mice of the same genotype (Student's t-test). All data are presented as means  $\pm$  s.e.m.

## Supplementary Figure 3

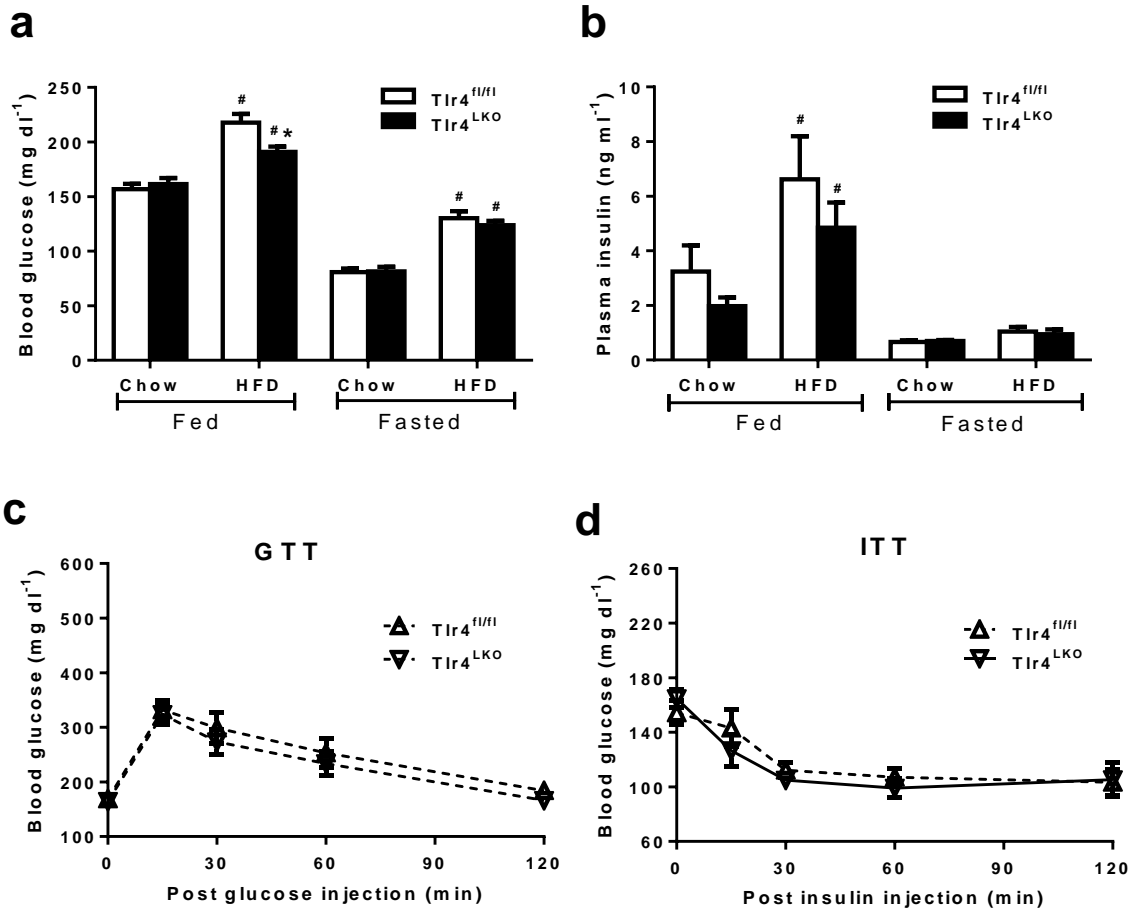

**Supplementary Figure 3. HFD-fed Tlr4<sup>LKO</sup> mice had reduced blood glucose levels under fed condition.** (a-b) Blood glucose levels (a, n = 19-22) and plasma insulin concentrations (b, n = 5) in Tlr4<sup>fl/fl</sup> and Tlr4<sup>LKO</sup> mice after 8 weeks of chow or HFD collected under either fed or overnight fasting states. (c-d) Chow-fed Tlr4<sup>fl/fl</sup> and Tlr4<sup>LKO</sup> mice (n = 8) were fasted for 5 h for (c) glucose tolerance test (GTT, 1.2 mg g<sup>-1</sup> BW) and (d) insulin tolerance test (ITT, 1.5 mU g<sup>-1</sup> BW). \*p < 0.05, compared between Tlr4<sup>fl/fl</sup> and Tlr4<sup>LKO</sup> mice on the same diet; #p < 0.05, compared between different diets for mice of the same genotype (Student's t-test). All data are presented as means ± s.e.m.

## Supplementary Figure 4

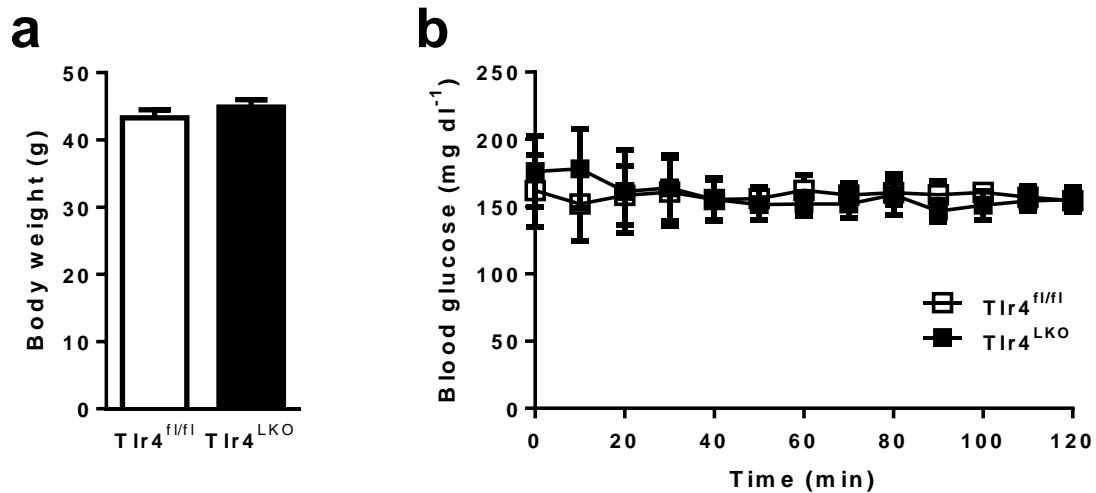

**Supplementary Figure 4. Tlr4<sup>fl/fl</sup> and Tlr4<sup>LKO</sup> mice had similar body weight and comparable blood glucose levels during hyperinsulinemic-euglycemic clamp experiment.** After 16 weeks HFD feeding, hyperinsulinemic-euglycemic (10 mU kg<sup>-1</sup> min<sup>-1</sup>, 150 mg dl<sup>-1</sup>, respectively) clamps of 120 minutes were performed in conscious, chronically catheterized, 4- to 5-hour-fasted Tlr4<sup>fl/fl</sup> and Tlr4<sup>LKO</sup> mice (n = 6-7). **(a)** Body weight. **(b)** Blood glucose levels during the clamps. All data are presented as means ± s.e.m.

## Supplementary Figure 5

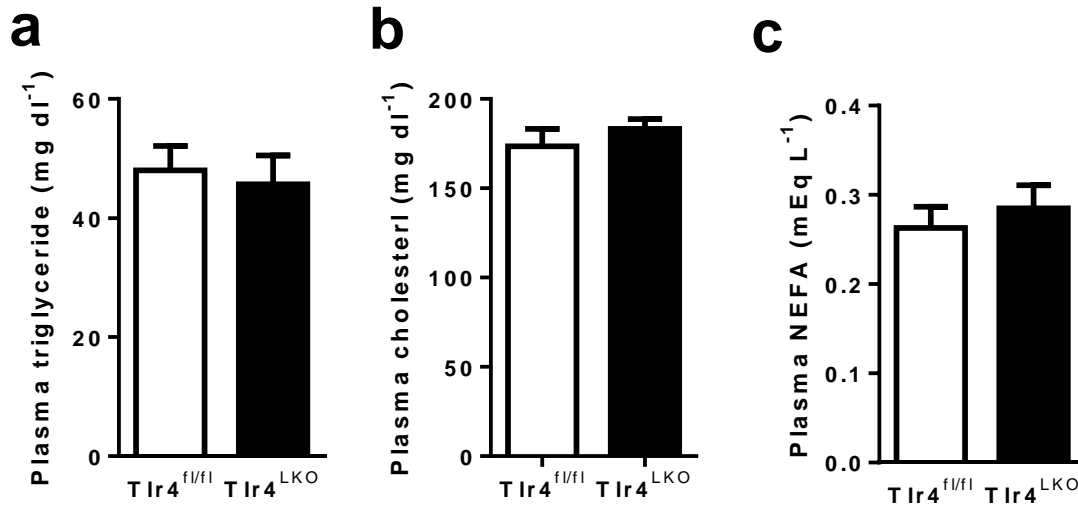

**Supplementary Figure 5. HFD-fed  $Tlr4^{LKO}$  mice exhibited similar plasma lipid concentrations compared to their controls.** Mice were fed HFD for 12 weeks (n = 7-9). **(a)** Plasma levels of triglyceride. **(b)** Plasma cholesterol levels. **(c)** Plasma non-esterified fatty acids (NEFA) levels. All data are presented as means  $\pm$  s.e.m.

## Supplementary Figure 6

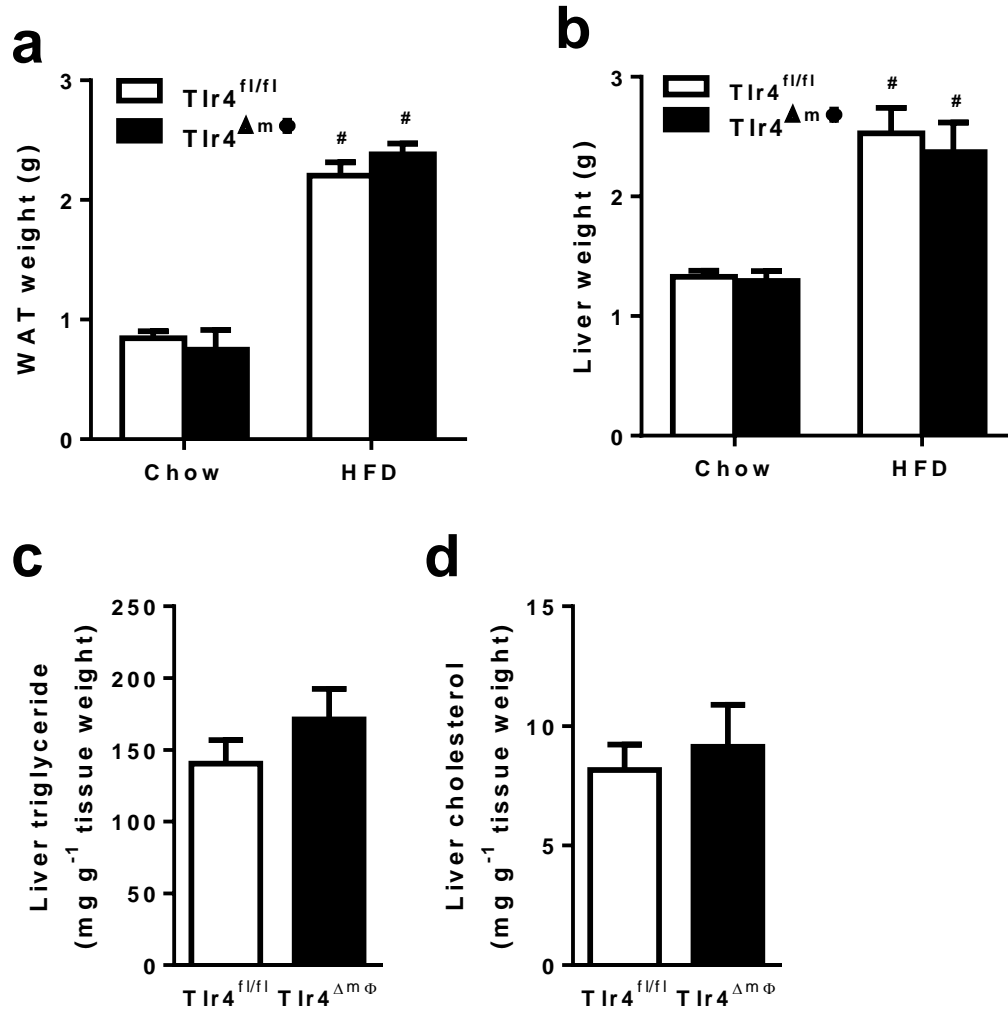

**Supplementary Figure 6. Macrophage Tlr4 deficiency does not protect mice from diet-induced hepatic steatosis.** (a) Epididymal fat pad weight in mice after either chow (n = 6-10) or HFD (n = 7-8) for 12 weeks. (b) Liver weight in mice fed either chow (n = 7-10) or HFD (n = 13) for 12 weeks. (c) Liver triglyceride contents in HFD-fed mice (n = 6-7). (d) Liver cholesterol contents in HFD-fed mice (n = 7). #  $p < 0.05$ , compared between different diets for mice of the same genotype (Student's t-test). All data are presented as means  $\pm$  s.e.m.

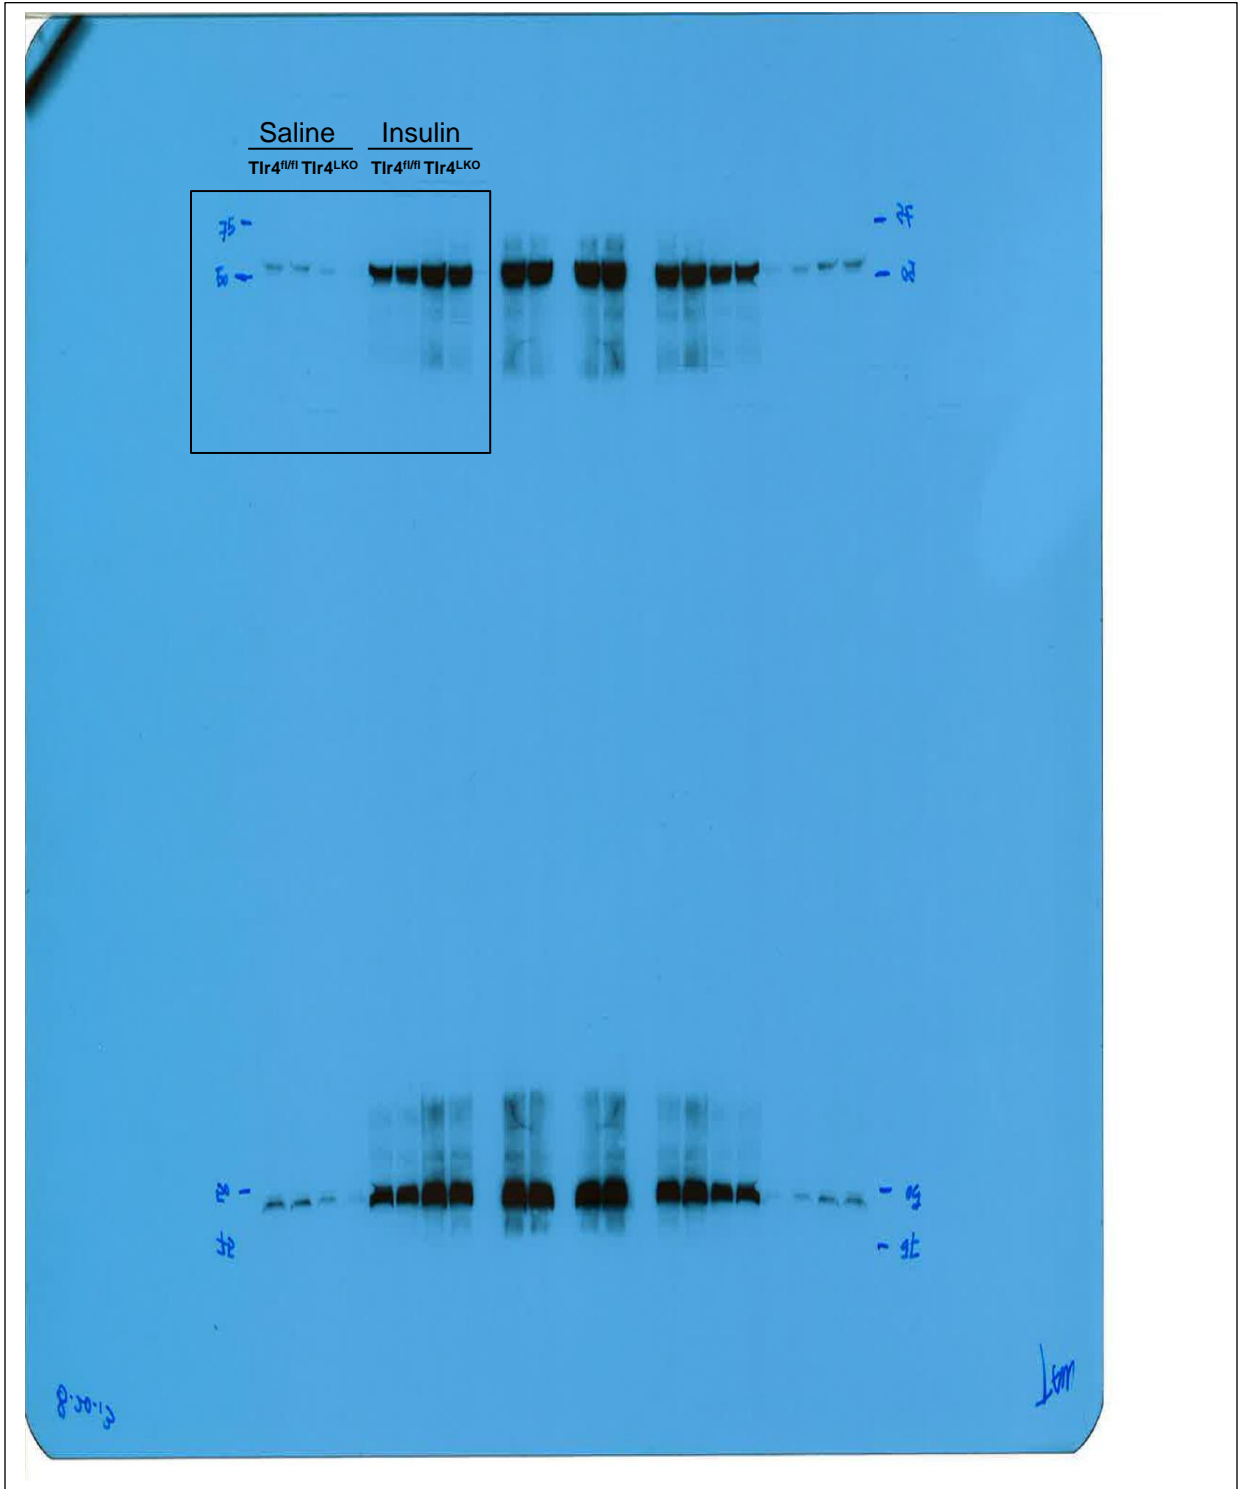

Supplementary Figure 7. Scanned western blot of p-Akt in white adipose tissue (WAT) in Figure 2g.

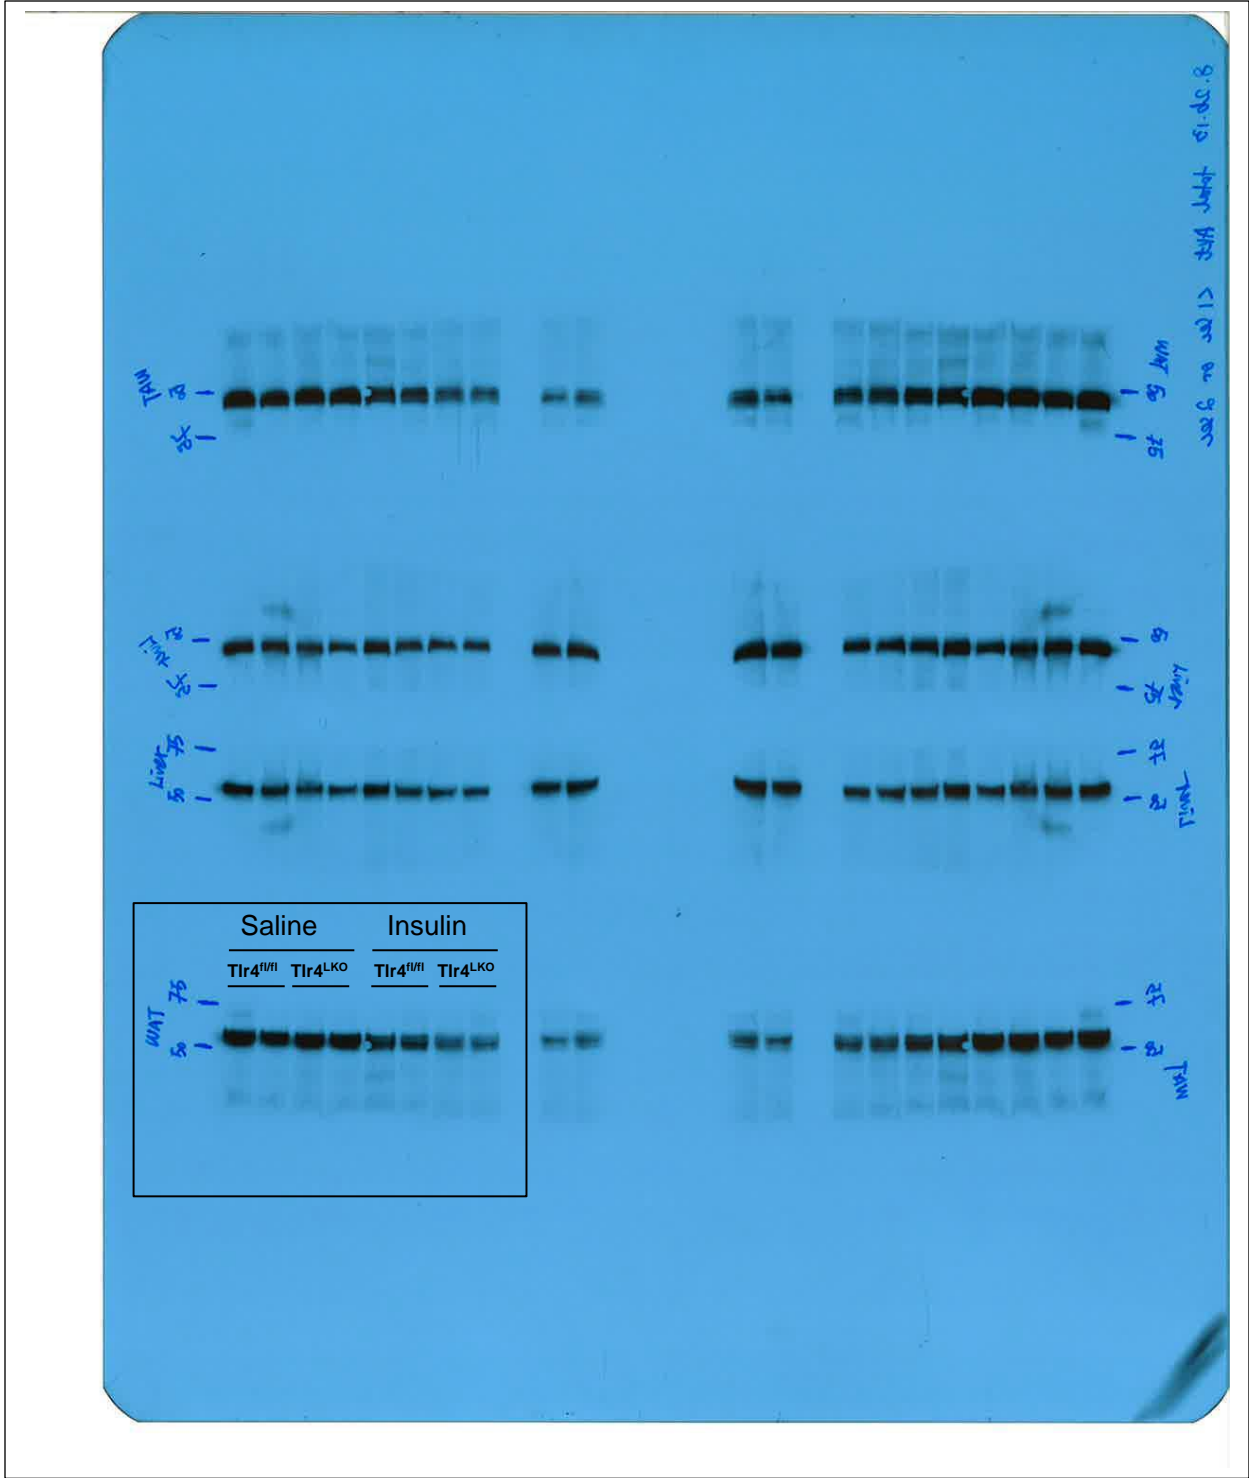

Scanned western blot of total Akt (t-Akt) white adipose tissue (WAT) in Figure 2g.
